# Supplementary material for: Integration of automatic implicit geological modelling in deterministic geophysical inversion
Source: Copernicus journal article supplement (doi:10.5194/se-15-63-2024), 2024-02-02
Supplement: Supplementary file 1 [file se-15-63-2024-supplement.pdf]

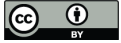

*Supplement of*

## **Integration of automatic implicit geological modelling in deterministic geophysical inversion**

**Jérémie Giraud et al.**

*Correspondence to:* Jérémie Giraud ([jeremie.giraud@univ-lorraine.fr](mailto:jeremie.giraud@univ-lorraine.fr))

The copyright of individual parts of the supplement might differ from the article licence.

**Supplementary material available at:**

Giraud (2023); Giraud and Caumon (2023); Giraud et al. (2023)

**Reference and links:**

Giraud, J.: Synthetic tests: unconstrained multiple level set inversions with errors in the starting model and noise in the data, <https://doi.org/10.5281/zenodo.7919381>, 2023.

Giraud, J. and Caumon, G.: Evolution of model and geological inconsistencies during inversion, Zenodo dataset, <https://doi.org/10.5281/zenodo.7920886>, (2023).

Giraud, J., Caumon, G., and Grose, L.: Synthetic datasets used for numerical testing of geology-geophysics integration, <https://doi.org/10.5281/zenodo.7544954>, (2023).
